# Supplementary material for: Raman Enhancement and Photo-Bleaching of Organic Dyes in the Presence of Chemical Vapor Deposition-Grown Graphene
Source: MDPI journal article supplement (doi:10.3390/nano7100337), 2017-10-19
Supplement: s1 [file s1]

## Supporting Information

# Raman Enhancement and Photo-Bleaching of Organic Dyes in the Presence of Chemical Vapor Deposition-Grown Graphene

Jiixin Weng, Shichao Zhao <sup>1,2,\*</sup>, Zhiting Li <sup>2</sup>, Karen B. Ricardo <sup>2</sup>, Feng Zhou <sup>2</sup>, Hyojeong Kim <sup>2</sup> and Haitao Liu <sup>2,\*</sup>

<sup>1</sup> College of Materials & Environmental Engineering, Hangzhou Dianzi University, Hangzhou 310018, China

<sup>2</sup> Department of Chemistry, University of Pittsburgh, Pittsburgh, Pennsylvania, PA 15260, USA

\* Correspondence: zhaoshichao@hdu.edu.cn (S.Z.); hliu@pitt.edu (H.L.)

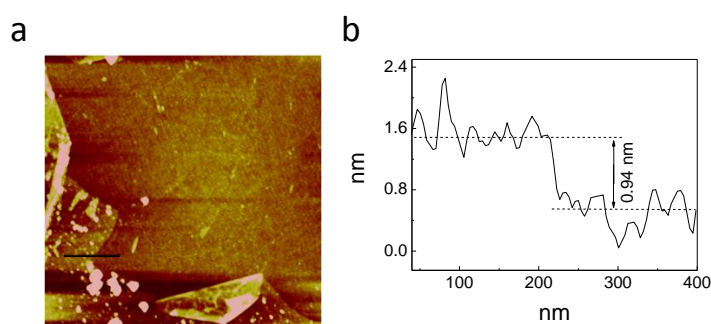

**Figure S1.** (a) Topographic AFM and (b) cross section of a graphene piece on a Gr/FITC/APTES/SiO<sub>2</sub>/Si sample. The sample was washed in acetone for 12 h. The height of the single layer graphene was higher than the expected 0.34 nm, which is well documented in the literature [1].

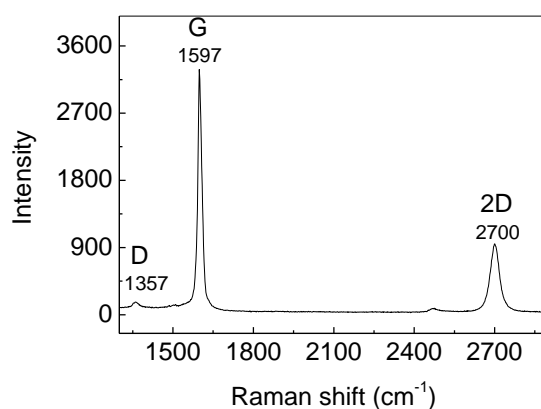

**Figure S2.** Raman spectrum of a single layer graphene transferred on the SiO<sub>2</sub>/Si substrate.

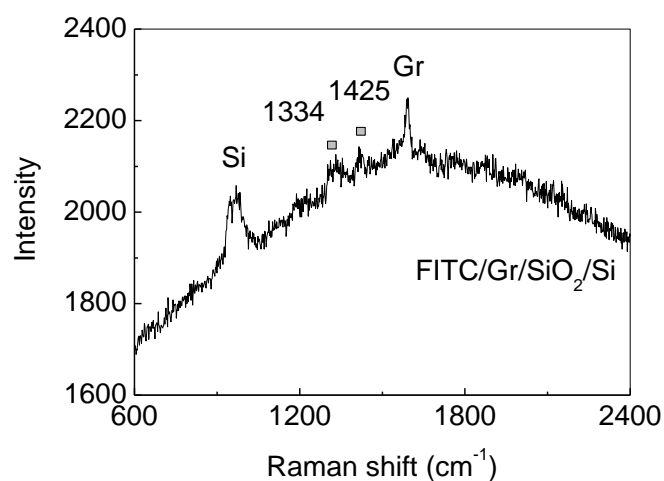

**Figure S3.** Raman-FL spectra of FITC adsorbed on the surface of graphene (FITC/Gr/SiO<sub>2</sub>/Si).

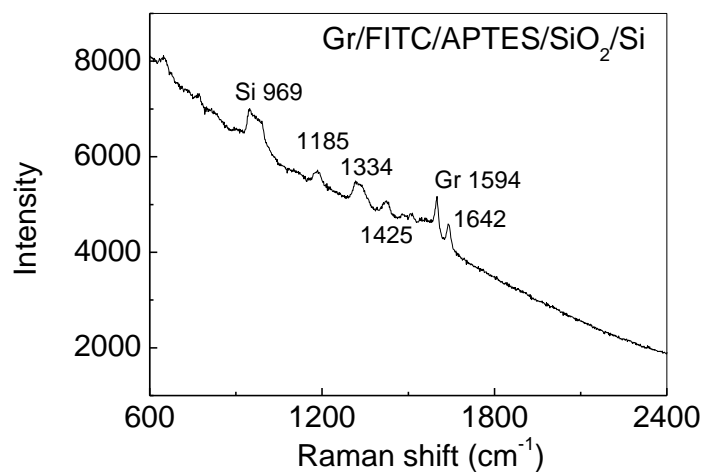

**Figure S4.** Raman-fluorescence spectra of FITC in the presence of graphene (Gr/FITC/APTES/SiO<sub>2</sub>/Si). The sample was the same one in Figure 2b. The spectrum was integrated for 10 min.

## Reference

1. Zhao, S.C.; Surwade, S.P.; Li, Z.T.; Liu, H.T. Photochemical oxidation of CVD-grown single layer graphene. *Nanotechnology* **2012**, *23*, 355703.
